# Supplementary material
Source: publisher figshare collection journal article supplement (https://acs.figshare.com/ndownloader/files/3948361)
Supplement: Supplementary file 1 [file 3948361]

## Supporting Information

### **A nano Ultra-Performance Liquid Chromatography – High Resolution Mass Spectrometry Approach for Global Metabolomic Profiling and Case Study on Drug-Resistant Multiple Myeloma**

*Drew R. Jones<sup>1</sup>, Zhiping Wu<sup>1</sup>, Dharminder Chauhan<sup>2</sup>, Kenneth C. Anderson<sup>2</sup>, and Junmin Peng<sup>1,3\*</sup>*

<sup>1</sup>Departments of Structural Biology and Developmental Neurobiology, <sup>3</sup>St. Jude Proteomics Facility, St. Jude Children's Research Hospital, 262 Danny Thomas Place, Memphis, TN 38105, USA

<sup>2</sup>Dana-Farber Cancer Institute, 44 Binney Street, Dana 1B02, Boston, MA 02115

**\*Corresponding Author Email:** [Junmin.Peng@StJude.org](mailto:Junmin.Peng@StJude.org)

#### **Contents**

1. Figure S1. Pathway enrichment analysis of regulated metabolites
2. Table S1 Metabolite ontology enrichment



|                                                    | KEGG ID | Fold Change (BR/BS) |
|----------------------------------------------------|---------|---------------------|
| <b>Porphyrin Metabolism</b>                        |         |                     |
| Protoporphyrinogen IX                              | C01079  | 32.4                |
| Protoporphyrin                                     | C02191  | -12.9               |
| <b>Purine Metabolism</b>                           |         |                     |
| ADP-ribose                                         | C00301  | 13.6                |
| SAICAR                                             | C04823  | 3.7                 |
| Adenylosuccinate                                   | C03794  | -5.4                |
| Guanosine monophosphate (GMP)                      | C00144  | -3.3                |
| <b>Pyrimidine Metabolism</b>                       |         |                     |
| Deoxycytidylic acid (dCMP)                         | C00239  | 34.0                |
| 2'-Deoxyuridine 5'-diphosphate (dUTP)              | C01346  | -28.2               |
| <b>Amino Sugar and Nucleotide Sugar Metabolism</b> |         |                     |
| UDP-N-acetylglucosamine                            | C00043  | 7.0                 |
| CMP-N-glycolylneuraminate                          | C03691  | 10.0                |
| <b>Carbon Metabolism</b>                           |         |                     |
| 10-Formyl-THF                                      | C00234  | 14.4                |
| 5,10-Methylene-THF                                 | C00143  | 5.6                 |
| Tetrahydrofolate (THF)                             | C00101  | 10.6                |
| Acetyl-CoA                                         | C00024  | 16.3                |
| Malonyl-CoA                                        | C00083  | 12.9                |
| Citramalyl-CoA                                     | C01011  | -86.5               |
| Tetrahydrofolate (THF)                             | C00101  | 10.6                |

**Table S1.** Selected metabolite ontology enrichment of regulated metabolites identified in bortezomib resistant and sensitive myeloma cell lines. Data were generated with KegArray and show the fold-change between BR and BS cells. Negative values indicate down-regulation in BR cells as compared to BS cells.
